# Supplementary material for: Current concepts from diagnosis to management in Gorham–Stout disease: a systematic narrative review of about 350 cases
Source: PubMed Central journal article supplement — EFORT Open Rev. 2022 Jan 11;7(1):35–48. doi: 10.1530/EOR-21-0083 (PMC8788153; doi:10.1530/eor-21-0083), 2022-01-11
Supplement: EOR-21-0083supplementary_table_1.pdf [file EOR-21-0083supplementary_table_1.pdf]

| <b>Supplemental Table 1</b> |                                                         |                      |               |                         |                         |            |                        |                  |                   |                 |
|-----------------------------|---------------------------------------------------------|----------------------|---------------|-------------------------|-------------------------|------------|------------------------|------------------|-------------------|-----------------|
| <b>Year</b>                 | <b>Reference</b>                                        | <b>Bone involved</b> | <b>Gender</b> | <b>Age at diagnosis</b> | <b>Visceral involv.</b> | <b>Rxt</b> | <b>Bisphosphonates</b> | <b>Sirolimus</b> | <b>Interferon</b> | <b>Outcomes</b> |
| 1955                        | Gorham and Stout 1955. J Bone Joint Surg. 37;985--1004. | MF (SP RI UL)        | M             | 16                      | CT                      | N          | N                      | N                | N                 | DIED            |
| 1955                        | Gorham and Stout 1955. J Bone Joint Surg. 37;985--1004. | MF (SP+LL)           | F             | 5                       | N                       | N          | N                      | N                | N                 | n.a.            |
| 1955                        | Gorham and Stout 1955. J Bone Joint Surg. 37;985--1004. | UF (LL)              | M             | 11                      | N                       | N          | N                      | N                | N                 | AWD             |
| 1955                        | Gorham and Stout 1955. J Bone Joint Surg. 37;985--1004. | UF (UL)              | M             | 44                      | N                       | N          | N                      | N                | N                 | n.a.            |
| 1955                        | Gorham and Stout 1955. J Bone Joint Surg. 37;985--1004. | MF (UL+SP+RI)        | M             | 20                      | N                       | N          | N                      | N                | N                 | n.a.            |
| 1955                        | Gorham and Stout 1955. J Bone Joint Surg. 37;985--1004. | UF(RI)               | M             | 21                      | N                       | N          | N                      | N                | N                 | n.a.            |
| 1955                        | Gorham and Stout 1955. J Bone Joint Surg. 37;985--1004. | UF(CR)               | F             | 36                      | N                       | N          | N                      | N                | N                 | n.a.            |
| 1955                        | Gorham and Stout 1955. J Bone Joint Surg. 37;985--1004. | MF (UL+RI)           | F             | 41                      | N                       | N          | N                      | N                | N                 | n.a.            |
| 1958                        | Aston 1958. J Bone Joint Surg. 40B;514--518.            | UF (LL)              | F             | 18                      | N                       | N          | N                      | N                | N                 | AWD             |
| 1958                        | Branco and Horta 1958. J Bone Joint Surg. 40B;519--527. | MF(PG+LL)            | M             | 13                      | N                       | N          | N                      | N                | N                 | n.a.            |
| 1958                        | Butler et al., 1958. J Bone Joint Surg. 40B;487--493.   | UF (LL)              | M             | 5                       | N                       | N          | N                      | N                | N                 | n.a.            |
| 1958                        | Johnson and McClure 1958. Radiology 71;28--41           | UF (PG)              | F             | 29                      | CT                      | N          | N                      | N                | N                 | DIED            |
| 1958                        | Milner and Baker 1958. J Bone Joint Surg. 40B;502--513  | UF (UL)              | F             | 68                      | N                       | N          | N                      | N                | N                 | n.a.            |
| 1964                        | Castlman and McNeely 1964. NEJM 270;731--736.           | UF (SP)              | M             | 24                      | N                       | N          | N                      | N                | N                 | n.a.            |
| 1964                        | Halliday et al., 1964. Radiology 82;637--644            | MF (SP+RI)           | M             | 27                      | CT                      | Y          | N                      | N                | N                 | DIED            |
| 1964                        | Halliday et al., 1964. Radiology 82;637--644            | UF (LL)              | M             | 1                       | NR                      | Y          | N                      | N                | N                 | n.a.            |

|      |                                                         |               |   |    |      |   |   |   |   |      |
|------|---------------------------------------------------------|---------------|---|----|------|---|---|---|---|------|
| 1964 | Halliday et al., 1964. Radiology 82;637--644            | UF (PG)       | M | 23 | NR   | N | N | N | N | n.a. |
| 1964 | Halliday et al., 1964. Radiology 82;637--644            | UF (RI)       | F | 15 | CT   | N | N | N | N | n.a. |
| 1967 | Kyllonen 1967. Ann Thorac Surg.4;559--563.              | UF(RI)        | M | 16 | CT   | Y | N | N | N | n.a. |
| 1968 | Poirier 1968. J Bone Joint Surg. 50B;158--160.          | UF(UL)        | M | 37 | N    | Y | N | N | N | n.a. |
| 1970 | Kery and Wouters 1970. J Bone Joint Surg. 52B;452--459. | MF (PG+LL)    | F | 12 | N    | N | N | N | N | DIED |
| 1970 | Kery and Wouters 1970. J Bone Joint Surg. 52B;452--459. | UF(LL)        | M | 10 | N    | N | N | N | N | n.a. |
| 1971 | Ellis and Adams 1971. J Oral Surg. 29;659--663.         | MF(CR+SP)     | F | 55 | CT   | N | N | N | N | DIED |
| 1972 | Cherrick et al., 1972. J Oral Med. 27;67--74.           | UF (CR)       | M | 27 | N    | N | N | N | N | n.a. |
| 1974 | Booth and Burke 1974. J Oral Surg. 32;787--791.         | UF (CR)       | N | 29 | N    | N | N | N | N | n.a. |
| 1974 | Thompson and Schuman 1974. Clin. Orthop. 103;206--211.  | UF (PG)       | M | 48 | N    | N | N | N | N | n.a. |
| 1976 | Patrick 1976. J Bone Joint Surg. 58B;347.               | MG (RI+UL+SP) | M | 28 | CT   | N | N | N | N | AH   |
| 1977 | Heyden et al., 1977. J Bone Joint Surg 59;57--59.       | UF (PG)       | M | 3  | N    | Y | N | N | N | n.a. |
| 1977 | Heyden et al., 1977. J Bone Joint Surg 59;57--59.       | UF (SP)       | M | 34 | N    | Y | N | N | N | n.a. |
| 1977 | Heyden et al., 1977. J Bone Joint Surg 59;57--59.       | UF (UL)       | M | 15 | N    | Y | N | N | N | n.a. |
| 1978 | Murphy et al., 1978. J Oral Surg.36 ;318--322.          | UF(CR)        | M | 34 | N    | N | N | N | N | n.a. |
| 1979 | Heuck 1979. Skeletal Radiol. 3;241-243.                 | UF (CR)       | M | 22 | N    | Y | N | N | N | n.a. |
| 1980 | Abrahams et al., 1980. AJR 135;1084--1086.              | MF (PG)       | M | 1  | N    | N | N | N | N | AWD  |
| 1981 | Kurczynski and Horwitz 1981.                            | UF (CR)       | F | 14 | CSFL | Y | N | N | N | AH   |

|      |                                                                                   |               |   |    |        |   |   |   |   |      |
|------|-----------------------------------------------------------------------------------|---------------|---|----|--------|---|---|---|---|------|
|      | Cancer 48;255--256.                                                               |               |   |    |        |   |   |   |   |      |
| 1983 | Heffez et al., 1983. Oral Surg Oral Med Oral Pathol Oral Radiol Endod 4;331--343. | MF (CR+SP+UL) | M | 13 | N      | Y | N | N | N | AWD  |
| 1985 | Hanly et al., 1985. J Rheumatology 2;580--582.                                    | MF (UL)       | F | 62 | N      | Y | N | N | N | AH   |
| 1987 | Carneiro and Steglich 1987. J Hand Surg 12A;629--634.                             | Carpals       | F | 13 | N      | Y | N | N | N | AH   |
| 1987 | Choma et al., 1987. Am J Med 83;1151--1156.                                       | MF (UL+RI)    | M | 16 | CT     | Y | N | N | N | DIED |
| 1989 | Dunkelman et al., 1989. Arch. Dis Childhood 64;1058--1060.                        | MF (UL+RI+LL) | M | 0  | CT     | N | N | N | N | AH   |
| 1990 | Dickson et al., 1990. Bone 11;205-- 210.                                          | MF (UL)       | F | 44 | N      | Y | N | N | N | AH   |
| 1992 | Tauro et al., 1992. J Bone Joint SrugBr 74; 9289--29.                             | UF (UL)       | M | 52 | N      | N | N | N | N | n.a. |
| 1993 | Schiel and Prein 1993. Head & Neck 15;352--356.                                   | UF (CR)       | F | 14 | N      | Y | N | N | N | AH   |
| 1994 | Tie et al., 1994. Chest 105;208--213.                                             | UF (RI)       | M | 26 | CT+PCE | Y | N | N | N | DIED |
| 1994 | Tie et al., 1994. Chest 105;208--213.                                             | MF (UL+LL+RI) | M | 18 | CT     | N | N | N | N | AWD  |
| 1994 | Prabhu et al., 1994. Indian Pediatr 31;1542--1544.                                | MF (UL+RI)    | M | 10 | CT     | N | N | N | N | AWD  |
| 1995 | Stove and Reichelt 1995. Arch Ortop Trauma Surg 114;207--210.                     | MF (PG+LL)    | F | 49 | SK     | Y | Y | N | N | AWD  |
| 1996 | Devlin et al., 1996. J Clin Endocrinol Metab 81;1893--1897.                       | MF (CR)       | M | 9  | N      | N | Y | N | N | n.a. |
| 1996 | Livesley et al., 1996. Skeletal Radiol 25;403--405.                               | UF (SP)       | M | 5  | N      | N | Y | N | N | AWD  |
| 1996 | McNeil et al., 1996. Thorax 51;1275--1276.                                        | MF (SP+RI)    | M | 21 | CT     | Y | N | N | N | AH   |

|      |                                                          |               |   |    |        |   |   |   |   |      |
|------|----------------------------------------------------------|---------------|---|----|--------|---|---|---|---|------|
| 1996 | Nemec et al., 1996. J Bone Joint Surg Br 78;666--667.    | UF (PG)       | M | 25 | N      | N | N | N | N | AH   |
| 1996 | Riantawan et al., 1996. Thorax 51;1277--1278.            | MF (UL+RI+SP) | M | 27 | CT     | N | N | N | N | DIED |
| 1997 | Chung et al., 1997. Skeletal Radiol 26;55--59.           | MF (RI+SP)    | F | 48 | N      | Y | N | N | N | AWD  |
| 1997 | Frankel et al., 1997. Pediatr Radiol 27;265--267.        | MF (CR+LL+PG) | F | 14 | N      | Y | N | N | Y | AH   |
| 1997 | Hagberg et al., 1997. Lancet 350;1822--1823.             | MF (SP+UL+RI) | M | 19 | CT     | Y | Y | N | Y | AH   |
| 1997 | Khosrovi et al., 1997. J Neurosurg 87;773--780.          | UF (CR+SP)    | M | 62 | PNC    | Y | N | N | N | AH   |
| 1997 | Mawk et al., 1997. Childs Nerv Syst 13;622--625.         | MF (CR+SP+UL) | M | 6  | CT+PCE | Y | N | N | N | AH   |
| 1997 | Pazzaglia et al., 1997. Int Orthop 21;303--307.          | UF (LL)       | M | 55 | N      | N | N | N | N | AH   |
| 1997 | Sato et al., 1997. Arch Orthop Trauma Surg 116;510--513. | UF (UL)       | M | 15 | N      | N | N | N | N | AH   |
| 1997 | Speith et al., 1997. Skeletal Radiol 26;659--663.        | UF (UL)       | F | 46 | N      | N | N | N | N | n.a. |
| 1998 | Manisali and Ozaksoy 1998. Eur Radiol 8;1647--1650.      | UF (UL)       | M | 60 | N      | N | N | N | N | n.a. |
| 1998 | Plasswilm et al., 1998. Respiration 65;417--420.         | UF (RI)       | M | 19 | CT     | Y | Y | N | N | n.a. |
| 1999 | Hofbauer et al., 1999. Rheumatology 38;904--905.         | UF (UL)       | M | 8  | N      | N | N | N | N | AH   |
| 1999 | Moller et al., 1999. J Bone Joint Surg Br. 81;501--506.  | UF(UL)        | F | 56 | N      | N | N | N | N | AH   |
| 1999 | Moller et al., 1999. J Bone Joint Surg Br. 81;501--506.  | UF (UL)       | F | 83 | N      | N | N | N | N | n.a. |
| 1999 | Moller et al., 1999. J Bone Joint Surg Br. 81;501--506.  | UF (RI)       | F | 19 | N      | N | N | N | N | AH   |
| 1999 | Moller et al., 1999. J Bone Joint Surg Br. 81;501--506.  | UF (LL)       | F | 70 | N      | N | N | N | N | AH   |
| 1999 | Moller et al., 1999. J Bone Joint                        | UF (LL)       | F | 77 | N      | N | N | N | N | AH   |

|      |                                                                   |               |   |    |       |      |   |   |   |      |
|------|-------------------------------------------------------------------|---------------|---|----|-------|------|---|---|---|------|
|      | Surg Br. 81;501--506.                                             |               |   |    |       |      |   |   |   |      |
| 1999 | Moller et al., 1999. J Bone Joint Surg Br. 81;501--506.           | UF (PG)       | F | 78 | N     | N    | N | N | N | AH   |
| 2000 | Szabo and Habre 2000. Anaesthesia 55;157--159.                    | UF (UL+RI)    | M | 8  | N     | N    | N | N | N | n.a. |
| 2001 | Hirayama et al., 2001. J Pathol 195;624--630.                     | UF (CR)       | F | 7  | N     | N    | N | N | N | n.a. |
| 2002 | Bode--Lesniewska et al., 2002. Skeletal Radiol 31;724--729.       | MF (UL+RI+SP) | F | 15 | N     | Y    | N | N | N | DIED |
| 2002 | Fujiu et al., 2002. Ann Thorac Surg . 73;1956--1957.              | MF (UL+RI)    | M | 15 | CT    | N    | N | N | N | DIED |
| 2002 | Krohel et al., 2002. Am J Ophthalmol 133;729--730.                | UF (CR)       | F | 43 | N     | N    | N | N | N | AH   |
| 2002 | Lee et al., 2002. J Korean Med Sci 17;826--829.                   | MF (SP+RI)    | F | 25 | CT    | Y    | N | N | N | AWD  |
| 2002 | Miller 2002. Can J Surg 45;381--382.                              | UF (SP)       | M | 2  | CT    | N    | N | N | N | DIED |
| 2002 | Yoo et al., 2002. Korean J Radiol 2002. 3;130--132.               | MF (UL+RI)    | M | 38 | CT+MM | Y    | N | N | N | AH   |
| 2002 | Yoo et al., 2002. Skeletal Radiol 31;301--306.                    | MF (PG+LL)    | F | 20 | N     | N    | N | N | N | AWD  |
| 2002 | Yoo et al., 2002. Skeletal Radiol 31;301--306.                    | MF (RI+SP)    | F | 25 | CT    | Y    | N | N | N | AH   |
| 2003 | Bruch--Gerharz et al., 2003. JAMA 289;1479--1480.                 | MF (LL)       | M | 21 | SK    | Y    | N | N | N | AH   |
| 2003 | Chong et al., 2003. Spine 28;e355--358.                           | UF (SP)       | M | 49 | N     | N    | N | N | N | AH   |
| 2003 | Fontanesi 2003. J Pediatr Hematol Oncol 25;816--817.              | UF (UL)       | M | 21 | CT    | Y    | N | N | N | AH   |
| 2003 | Lee et al., 2003. Arch Otolaryngol Head Neck Surg 129;1340--1343. | UF (CR)       | F | 9  | CT    | Y    | N | N | N | DIED |
| 2003 | Lee et al., 2003. Arch Otolaryngol Head Neck Surg 129;1340--1343. | UF (CR)       | F | 0  | CT    | n.a. | N | N | N | DIED |

|      |                                                                |                  |   |    |         |      |      |      |      |      |
|------|----------------------------------------------------------------|------------------|---|----|---------|------|------|------|------|------|
| 2003 | Motamedi et al., 2003. J Oral Maxillofac Surg. 61;957--963.    | UF (CR)          | M | 19 | N       | n.a. | N    | N    | N    | AWD  |
| 2003 | Ricalde et al., 2003. Int J Oral Maxillofac Surg 32;222--226.  | UF (CR)          | M | 5  | N       | Y    | N    | N    | N    | AWD  |
| 2004 | Brown et al., 2004. Clin Nucl Med 29;709--711.                 | UF (PG)          | M | 24 | N       | n.a. | n.a. | n.a. | n.a. | n.a. |
| 2004 | Lo et al., 2004. AJNR Am J Neuroradiol 25;415--418.            | UF (CR)          | M | 23 | N       | N    | N    | N    | N    | AWD  |
| 2004 | Tsang et al., 2004. J Oal Maxillofac Surg 62;225--230.         | UF (CR)          | F | 9  | N       | N    | Y    | N    | N    | n.a. |
| 2004 | Tsang et al., 2004. J Oal Maxillofac Surg 62;225--230.         | UF (CR)          | F | 26 | N       | N    | N    | N    | N    | AH   |
| 2005 | Aizawa et al. 2005. Tohoku J Exp Med 205;187--196.             | UF (SP)          | M | 10 | N       | N    | N    | N    | N    | AWD  |
| 2005 | Boyer et al., 2005. Clin Rheumatol 24;551--555.                | UF (PG)          | M | 22 | N       | N    | N    | N    | N    | AWD  |
| 2005 | Duffy et al., 2005. Clin Med Res 3;83 86.                      | MF (UL+SP+RI)    | F | 31 | CT+PCE  | Y    | N    | N    | N    | AH   |
| 2005 | Hammer et al., 2005. J Bone Miner Res 20;350--353.             | UF (RI)          | F | 45 | N       | N    | Y    | N    | N    | AH   |
| 2005 | Mignogna et al., 2005. Oral Oncol. 41;747--750.                | UF (CR)          | F | 23 | N       | N    | Y    | N    | N    | AH   |
| 2005 | Okafuji et al., 2005. J Thorac Imaging 20;284--287.            | UF (RI)          | M | 29 | CT      | N    | N    | N    | N    | AH   |
| 2005 | Paley et al., 2005. Br J Oral Maxillofac Surg 43;166--168.     | UF (CR)          | F | 55 | N       | N    | N    | N    | N    | AH   |
| 2005 | Takahashi et al., 2005. 40;e47-50.                             | MF (SP+RI+LL)    | F | 2  | CT+SK   | N    | N    | N    | Y    | AH   |
| 2006 | Agrawal et al., 2006. J Thorac Cardiovasc Surg 131;1205--1206. | MF (SP+RI)       | F | 25 | CT+CSFL | N    | N    | N    | N    | AH   |
| 2006 | Colucci et al., 2006. J Bone Miner Res 21;207--218.            | MF (UL+RI)       | F | 40 | CT      | N    | N    | N    | N    | DIED |
| 2006 | Girn et al., 2006. Acta Neurochir 148;909--913.                | MF (CR+SP+RI+LL) | F | 2  | CT      | Y    | Y    | N    | N    | DIED |

|      |                                                                                        |                  |   |    |      |   |   |   |   |      |
|------|----------------------------------------------------------------------------------------|------------------|---|----|------|---|---|---|---|------|
| 2006 | Hagerdoorn et al., 2006. Nat Clin Pract Oncol 3;693--697.                              | MF (SP+RI)       | M | 17 | CT   | N | Y | N | Y | DIED |
| 2006 | Kai et al., 2006. Clinical Radiology 61;1058--1064.                                    | UF (UL)          | M | 49 | N    | Y | N | N | N | AWD  |
| 2006 | Kai et al., 2006. Clinical Radiology 61;1058--1064.                                    | UF (UL)          | M | 5  | N    | N | N | N | N | AH   |
| 2006 | Kai et al., 2006. Clinical Radiology 61;1058--1064.                                    | MF (SP+UL)       | F | 35 | N    | N | N | N | N | AH   |
| 2006 | Pfleger et al., 2006. J Pediatr Hematol Oncol 28;231--233.                             | MF (PG+RI+UL+LL) | M | 18 | CT   | Y | N | N | Y | AH   |
| 2007 | Bruch--Gerharz et al., 2007. J Am Acad Dermatol. 56;S21--25.                           | MF (LL)          | M | 21 | SK   | Y | N | N | N | AH   |
| 2008 | Atalabi et al., 2008. Skeletal Radiol 2008. 37;1041--10146.                            | MF (SP+RI+LL)    | F | 4  | CT   | Y | N | N | N | DIED |
| 2008 | Boyle et al., 2008. Heart Lung Circ 17;64--66.                                         | UF (RI)          | M | 17 | CT   | N | N | N | N | DIED |
| 2008 | Newland et al., 2008. Pathology 40;420--423.                                           | UF (CR)          | M | 27 | CSFL | N | N | N | N | n.a. |
| 2008 | Yalniz et al., 2008. J BR--BTR 91;14--17.                                              | UF (UL)          | M | 14 | N    | N | N | N | N | AWD  |
| 2009 | Franchi et al., 2009. J Clin Pathol 62;163--167.                                       | UF (PG )         | M | 13 | N    | N | N | N | N | AH   |
| 2009 | Franchi et al., 2009. J Clin Pathol 62;163--167.                                       | UF (LL)          | M | 13 | N    | N | N | N | N | AWD  |
| 2009 | Franchi et al., 2009. J Clin Pathol 62;163--167.                                       | MF (LL+PG)       | M | 23 | N    | N | N | N | N | n.a. |
| 2009 | Franchi et al., 2009. J Clin Pathol 62;163--167.                                       | UF(PG)           | F | 58 | N    | N | N | N | N | AWD  |
| 2010 | Gondivkar et al., 2010. Oral Surg Oral Med Oral Pathol Oral Radiol Endod 109;e41--e48. | UF (CR)          | M | 58 | N    | N | N | N | N | AWD  |
| 2009 | Kose et al., 2009. Pediatr Pulmonol 44;613--615.                                       | MF (UL+SP+RI)    | F | 9  | CT   | Y | N | N | Y | AH   |
| 2009 | Lehmann et al., 2009. Arch                                                             | MF (PG+LL)       | F | 61 | SK   | Y | Y | N | N | AWD  |

|      |                                                                                   |                  |   |     |      |      |      |      |      |      |
|------|-----------------------------------------------------------------------------------|------------------|---|-----|------|------|------|------|------|------|
|      | Ortop Trauma Surg 129;967--972.                                                   |                  |   |     |      |      |      |      |      |      |
| 2009 | Xin et al., 2009. Cases 2;7499.                                                   | UF (UL)          | F | 45  | N    | Y    | N    | N    | N    | AH   |
| 2009 | Yildiz et al., 2009. Paediat Anaesth 19;190--191.                                 | UF (RI)          | M | 6   | CT   | N    | N    | N    | N    | n.a. |
| 2009 | Zacharia et al., 2009. J Foot Ankle Surg 48;347--352.                             | UF (LL)          | M | 13  | N    | N    | N    | N    | N    | AH   |
| 2010 | Avelar et al., 2010. Int J Pediatr Otorhinolaryngol 74;319--322.                  | UF (CR)          | M | 9   | N    | N    | Y    | N    | N    | AH   |
| 2010 | Chiang et al., 2010. Neurology 75;e65.                                            | UF (CR)          | M | 46  | n.a. | n.a. | n.a. | n.a. | n.a. | n.a. |
| 2010 | Cushing et al., 2010. Otol Neurotol 31;789--792.                                  | UF (CR)          | M | 12  | CSFL | N    | N    | N    | N    | AWD  |
| 2010 | De Smet et al., 2010. Emerg Radiol 17;503--505.                                   | UF (RI)          | M | 8   | CT   | N    | Y    | N    | Y    | AH   |
| 2010 | Dupond et al., 2010. Bone 46;873--876.                                            | MF (CR+RI+UL+LL) | F | 16  | MM   | N    | N    | N    | Y    | AH   |
| 2010 | Grunewald et al., 2010. Ann Oncol 21;1733--1734.                                  | MF (UL+RI)       | M | 2.5 | CT   | N    | Y    | N    | Y    | AH   |
| 2010 | Kuriyama et al., 2010. J Pediatr Hematol Oncol 32;579--584.                       | UF (RI)          | F | 16  | CT   | N    | Y    | N    | N    | AH   |
| 2010 | Migliorati, 2010. Oral Surg Oral Med Oral Pathol Oral Radiol Endod 109;242--243.  | UF (CR)          | M | 58  | N    | N    | N    | N    | N    | n.a. |
| 2010 | Mowry et al., 2010. Laryngoscope 120;598--600.                                    | MF (CR+SP)       | F | 9   | N    | N    | N    | N    | N    | AWD  |
| 2010 | Perschbacher et al., 2010. Dentomaxillofac Radiol 39;119--123.                    | UF (CR)          | M | 56  | N    | Y    | N    | N    | N    | AWD  |
| 2010 | Seok et al., 2010. Thorac Cardiovasc Surg 58;492--493.                            | MF (RI+SP)       | M | 14  | CT   | Y    | N    | N    | N    | AH   |
| 2010 | Tong et al., 2010. Oral Surg Oral Med Oral Pathol Oral Radiol Endod 109;238--241. | UF (CR)          | F | 9   | N    | N    | Y    | N    | N    | AH   |



|      |                                                         |                     |   |    |    |   |   |   |   |      |
|------|---------------------------------------------------------|---------------------|---|----|----|---|---|---|---|------|
| 2010 | Zhang et al., 2010. Neurol India 58;144--145            | UF (CR)             | M | 40 | N  | N | N | N | N | AH   |
| 2011 | Brodzki et al., 2011. Acta Paediatr 100;1448--1453.     | MF (SP+PG+UL)       | M | 2  | CT | Y | N | N | Y | AH   |
| 2011 | Brodzki et al., 2011. Acta Paediatr 100;1448--1453.     | MF (SP+UL+LL+PG)    | F | 4  | CT | Y | N | N | Y | AH   |
| 2011 | Deng et al., 2011. J Craniofac Surg 22;2386--2388.      | UF (CR)             | M | 46 | N  | N | N | N | N | AWD  |
| 2011 | Deveci et al., 2011. Indian J Pediatr 78;737--739.      | MF (RI+CR+SP+UL+LL) | M | 6  | CT | N | Y | N | Y | DIED |
| 2011 | Heyd et al., 2011. Int J Radiat Oncol Phys 81;e179--85. | MF (PG+LL)          | M | 22 | N  | Y | N | N | N | AWD  |
| 2011 | Heyd et al., 2011. Int J Radiat Oncol Phys 81;e179--85. | UF (PG)             | F | 23 | N  | Y | N | N | N | AWD  |
| 2011 | Heyd et al., 2011. Int J Radiat Oncol Phys 81;e179--85. | MF (CR+SP)          | F | 24 | N  | Y | N | N | N | AWD  |
| 2011 | Heyd et al., 2011. Int J Radiat Oncol Phys 81;e179--85. | MF (PG+SP)          | M | 30 | N  | Y | N | N | N | AH   |
| 2011 | Heyd et al., 2011. Int J Radiat Oncol Phys 81;e179--85. | UF (CR)             | F | 34 | N  | Y | N | N | N | AH   |
| 2011 | Heyd et al., 2011. Int J Radiat Oncol Phys 81;e179--85. | MF (CR+SP)          | M | 38 | N  | Y | N | N | N | AH   |
| 2011 | Heyd et al., 2011. Int J Radiat Oncol Phys 81;e179--85. | UF (CR+SP)          | M | 44 | N  | Y | N | N | N | AH   |
| 2011 | Heyd et al., 2011. Int J Radiat Oncol Phys 81;e179--85. | MF (CR+SP+RI)       | M | 46 | N  | Y | N | N | N | AH   |
| 2011 | Heyd et al., 2011. Int J Radiat Oncol Phys 81;e179--85. | UF (CR)             | F | 55 | N  | Y | N | N | N | AWD  |
| 2011 | Heyd et al., 2011. Int J Radiat Oncol Phys 81;e179--85. | MF (SP+PG+LL)       | F | 61 | N  | Y | N | N | N | AH   |
| 2011 | Ruggieri et al., 2011. Skeletal Radiol 40;1391--1397.   | UF (LL)             | M | 13 | N  | N | N | N | N | AH   |
| 2011 | Ruggieri et al., 2011. Skeletal Radiol 40;1391--1397.   | UF (UL)             | F | 68 | N  | N | N | N | N | AH   |
| 2011 | Ruggieri et al., 2011. Skeletal                         | UF (LL)             | F | 36 | N  | N | N | N | N | n.a. |

|      |                                                              |                     |   |    |   |   |   |   |   |      |
|------|--------------------------------------------------------------|---------------------|---|----|---|---|---|---|---|------|
|      | Radiol 40;1391--1397.                                        |                     |   |    |   |   |   |   |   |      |
| 2011 | Ruggieri et al., 2011. Skeletal Radiol 40;1391--1397.        | UF (LL)             | M | 38 | N | N | Y | N | N | AH   |
| 2011 | Ruggieri et al., 2011. Skeletal Radiol 40;1391--1397.        | UF (SP)             | M | 4  | N | N | N | N | N | n.a. |
| 2011 | Ruggieri et al., 2011. Skeletal Radiol 40;1391--1397.        | UF (LL)             | M | 8  | N | N | N | N | N | AH   |
| 2011 | Ruggieri et al., 2011. Skeletal Radiol 40;1391--1397.        | MF (PG)             | M | 17 | N | N | N | N | N | n.a. |
| 2011 | Ruggieri et al., 2011. Skeletal Radiol 40;1391--1397.        | UF (LL)             | M | 31 | N | N | N | N | N | AH   |
| 2011 | Ruggieri et al., 2011. Skeletal Radiol 40;1391--1397.        | MF (LL)             | M | 63 | N | N | N | N | N | DIED |
| 2011 | Ruggieri et al., 2011. Skeletal Radiol 40;1391--1397.        | UF (PG)             | F | 58 | N | N | Y | N | N | DIED |
| 2011 | Ruggieri et al., 2011. Skeletal Radiol 40;1391--1397.        | UF (LL)             | M | 31 | N | Y | N | N | N | n.a. |
| 2011 | Ruggieri et al., 2011. Skeletal Radiol 40;1391--1397.        | UF (LL)             | M | 18 | N | N | N | N | N | AH   |
| 2011 | Ruggieri et al., 2011. Skeletal Radiol 40;1391--1397.        | MF (PG+LL)          | M | 25 | N | N | N | N | Y | AH   |
| 2011 | Silva 2011. Hand 6;85--89.                                   | MF(UL)              | F | 42 | N | N | Y | N | N | AH   |
| 2011 | Venkatramani et al., 2011. Pediatr Blood Cancer 56;667--670. | MF (CR+UL+RI+LL+SP) | M | 9  | N | N | N | N | N | AWD  |
| 2011 | Venkatramani et al., 2011. Pediatr Blood Cancer 56;667--670. | MF (CR+PG+UL+LL)    | F | 9  | N | N | N | N | N | AH   |
| 2011 | Venkatramani et al., 2011. Pediatr Blood Cancer 56;667--670. | MF (SP+RI+PG)       | M | 7  | N | N | N | N | N | AWD  |
| 2011 | Venkatramani et al., 2011. Pediatr Blood Cancer 56;667--670. | UF (PG)             | F | 11 | N | N | N | N | N | AH   |

|      |                                                              |               |   |    |    |   |   |   |   |      |
|------|--------------------------------------------------------------|---------------|---|----|----|---|---|---|---|------|
| 2011 | Venkatramani et al., 2011. Pediatr Blood Cancer 56;667--670. | MF (PG+SP)    | M | 12 | N  | N | N | N | N | AH   |
| 2011 | Venkatramani et al., 2011. Pediatr Blood Cancer 56;667--670. | MF (UL+LL+SP) | F | 13 | CT | N | N | N | N | AWD  |
| 2011 | Venkatramani et al., 2011. Pediatr Blood Cancer 56;667--670. | MF (SP+RI)    | M | 12 | CT | Y | N | N | N | DIED |
| 2011 | Venkatramani et al., 2011. Pediatr Blood Cancer 56;667--670. | MF (SP+RI)    | M | 14 | CT | N | N | N | N | AWD  |
| 2012 | He et al., 2012. J Craniofac Surg23;e293--295.               | UF (CR)       | M | 37 | N  | N | N | N | N | AWD  |
| 2012 | Huang et al., 2012. J Craniomaxillofac Surg 40;e174-177.     | UF (CR)       | M | 32 | N  | N | N | N | N | AWD  |
| 2012 | ZhengET AL., 2012. Exp Ther Med;4(3):449-451.                | MF (RI+LL+PG) | F | 5  | CT | N | Y | N | N | AH   |
| 2012 | Ray et al., 2012. Indian J Pathol Microbiol. 55;399--401.    | MF (UL)       | M | 20 | N  | N | Y | N | N | n.a. |
| 2013 | Scheller et al., 2013. Oral Maxillofac Surg Epub             | UF (CR)       | M | 76 | N  | N | N | N | N | n.a. |
| 2013 | Situma et al., 2013. J Pediatr Surg 2013. 48;239--242.       | MF (PG+LL)    | M | 10 | CT | N | N | Y | N | DIED |
| 2013 | Barman et al., 2013. NeuroRehabilitation;33(1):121-6.        | MF (UL+SP)    | M | 3  | CT | N | Y | N | N | AWD  |
| 2013 | Barman et al., 2013. NeuroRehabilitation;33(1):121-6.        | MF (SP)       | M | 15 | CT | N | Y | N | N | AWD  |
| 2013 | Tripathy et al., 2013. Orthop Surg;5(1):72-6.                | UF (LL)       | M | 54 | N  | Y | N | N | N | AH   |
| 2013 | Tavakoli Darestani et al.,2013. Trauma Mon;18(1):41-5.       | MF (UL)       | F | 51 | N  | N | N | N | N | AWD  |

|      |                                                                              |               |   |    |       |      |      |      |      |      |
|------|------------------------------------------------------------------------------|---------------|---|----|-------|------|------|------|------|------|
| 2013 | Maruani et al., 2013. <i>Pediatr Dermatol</i> ;30(3):391-4.                  | MF(LL)        | M | 0  | N     | N    | Y    | N    | N    | AWD  |
| 2013 | Leite et al., 2013. <i>Pediatr Dermatol</i> ;30(3):374-8.                    | UF (PG)       | F | 7  | SK    | Y    | Y    | N    | Y    | AH   |
| 2013 | Kilicoglu et al., 2013. <i>Spine J</i> ;13(5):e11-4.                         | UF (SP)       | M | 35 | N     | N    | N    | N    | N    | AWD  |
| 2013 | Yang et al., 2013. <i>Clin Nucl Med</i> ;38(5):361-4.                        | MF (SP+RI)    | M | 31 | N     | n.a. | n.a. | n.a. | n.a. | n.a. |
| 2013 | Noda et al., 2013. <i>Gen Thorac Cardiovasc Surg</i> ;61(6):356-8.           | UF (SP)       | M | 15 | CT    | Y    | N    | N    | Y    | AH   |
| 2013 | Morimoto et al., 2013. <i>Int J Pediatr Otorhinolaryngol</i> ;77(9):1596-600 | UF (CR)       | F | 11 | CSFL  | N    | N    | N    | Y    | AH   |
| 2013 | Sekharappa et al., 2013. <i>Asian Spine J</i> ;7(3):242-7.                   | MF (SP+RI)    | M | 15 | N     | N    | Y    | N    | N    | AH   |
| 2013 | Sekharappa et al., 2013. <i>Asian Spine J</i> ;7(3):242-7.                   | MF (UL+SP)    | M | 23 | CT    | N    | N    | N    | N    | AH   |
| 2013 | Huang et al., 2013. <i>Respir Care</i> ;58(11):e144-8.                       | MF (SP+ RI)   | M | 34 | CT    | Y    | N    | N    | Y    | n.a. |
| 2013 | Esmailiejah et al., 2013. <i>Arch Iran Med</i> ;16(11):686-90.               | MF (SP+LL)    | W | 32 | N     | N    | Y    | N    | N    | AH   |
| 2013 | Ozbayrak et al., 2013. <i>Korean J Radiol</i> ;14(6):946-50.                 | MF (UL)       | M | 38 | N     | Y    | N    | N    | N    | AWD  |
| 2013 | Müller et al., 2013. <i>Zentralbl Chir</i> ;138 Suppl 2:e101-4.              | UF (PG)       | M | 74 | N     | Y    | Y    | N    | N    | AH   |
| 2013 | Asha et al., 2013. <i>Gerodontology</i> ;30(4):296-302.                      | UF (CR)       | F | 60 | N     | N    | N    | N    | N    | AWD  |
| 2014 | Kakuta et al., 2014. <i>Spine J</i> ;14(1):e5-9.                             | UF (SP)       | M | 49 | AAA   | N    | N    | N    | N    | AH   |
| 2014 | Coulter et al., 2014. <i>Clin Neurol Neurosurg</i> ;116:83-6.                | UF (CR)       | F | 37 | N     | N    | Y    | N    | N    | AH   |
| 2014 | Yavaşoğlu et al., 2014. <i>Intern Med</i> ;53(1):75-6.                       | MF (SP+CR+PG) | F | 32 | CT+PE | N    | Y    | N    | Y    | AH   |
| 2014 | Posadas et al., 2014. <i>Eur Rev</i>                                         | MF (SP+CR+LL) | F | 15 | HE    | N    | N    | N    | N    | AH   |

|      |                                                                        |                  |   |    |         |      |      |      |      |      |
|------|------------------------------------------------------------------------|------------------|---|----|---------|------|------|------|------|------|
|      | Med Pharmacol Sci;18(1 Suppl):81-3.                                    |                  |   |    |         |      |      |      |      |      |
| 2014 | Gem et al., 2014. Acta Orthop Traumatol Turc;48(4):467-71.             | UF (LL)          | M | 53 | SK      | N    | Y    | N    | N    | AH   |
| 2014 | de Villiers et al., 2014. Radiology;270(3):931-5.                      | UF (UL)          | F | 77 | N       | N    | N    | N    | N    | AH   |
| 2014 | Nir et al., 2014. Pediatr Pulmonol;49(4):417-9.                        | MF (SP+CR+PG+RI) | F | 13 | MM      | N    | Y    | N    | Y    | AH   |
| 2014 | Koo et al., 2014. J Rheumatol;41(7):1430-2.                            | UF (PG)          | F | 37 | N       | N    | Y    | N    | N    | AH   |
| 2014 | DeLong et al., 2014. Plast Reconstr Surg Glob Open;2(7):e181.          | MF (UL+SP+RI)    | F | 3  | N       | N    | N    | N    | Y    | AWD  |
| 2014 | Daneshvar Kakhaki et al., 2014. Iran Red Crescent Med J;16(11):e12180. | UF (RI)          | M | 48 | CT      | Y    | Y    | N    | N    | AH   |
| 2014 | Gutiérrez Schiaffino et al., 2014. An Pediatr (Barc);81(6):e64-5.      | UF (SP)          | M | 6  | N       | N    | N    | N    | N    | n.a. |
| 2014 | Suero Molina et al., 2014. J Neurosurg Spine;21(6):956-60.             | UF (SP)          | M | 13 | CT+CSFL | N    | Y    | Y    | Y    | AH   |
| 2015 | Alves et al., 2015. Nucl Med Rev Cent East Eur;18(2):97-101.           | MF (LL)          | M | 48 | N       | N    | Y    | N    | N    | AWD  |
| 2015 | San Miguel López de Uralde. Med Clin (Barc);144(2):96.                 | UF (LL)          | F | 64 | n.a.    | n.a. | n.a. | n.a. | n.a. | n.a. |
| 2015 | Kim et al., 2015. Korean J Thorac Cardiovasc Surg;48(1):90-4.          | UF (RI)          | M | 16 | N       | Y    | N    | N    | Y    | AH   |
| 2015 | Zhao et al., 2015. J Craniofac Surg;26(2):e160-2.                      | UF (CR)          | M | 46 | N       | N    | N    | N    | N    | AWD  |
| 2015 | Ohla et al., 2015. BMC Surg;15:24.                                     | UF(CR)           | M | 25 | N       | N    | N    | N    | N    | AH   |
| 2015 | Sá et al., 2015. Rev Bras Ortop;50(2):239-42.                          | UF (LL)          | M | 48 | N       | N    | N    | N    | N    | n.a. |

|      |                                                                |               |   |    |       |      |      |      |      |      |
|------|----------------------------------------------------------------|---------------|---|----|-------|------|------|------|------|------|
| 2015 | Carbó et al., 2015. Eur Spine J;24 Suppl 4:S590-3.             | MF (PG+LL)    | M | 6  | N     | Y    | Y    | N    | Y    | n.a. |
| 2015 | González Luna et al., 2015. Arch Argent Pediatr;113(3):e153-6. | MF (SP+PG+UL) | M | 9  | MM    | N    | Y    | N    | Y    | n.a. |
| 2015 | Kunjur et al., 2015. J Craniofac Surg;26(4):e302-5.            | UF (CR)       | M | 45 | N     | N    | N    | N    | N    | AH   |
| 2015 | Yerganyan et al., 2015. J Bone Onco;4(2):42-6.                 | UF (LL)       | M | 28 | N     | Y    | Y    | N    | N    | AH   |
| 2015 | Shi et al., 2015. Skeletal Radiol;44(7):1033-8.                | MF (CR+UL)    | M | 26 | N     | N    | N    | N    | N    | AH   |
| 2015 | Baud et al., 2015. BMC Res Notes;8:333.                        | MF (SP+PG)    | F | 9  | GS    | N    | N    | N    | N    | AH   |
| 2015 | Rössler et al., 2015. J Pediatr Hematol Oncol;37(8):e481-5.    | MF (SP)       | M | 7  | CT    | N    | N    | N    | N    | DIED |
| 2015 | Rössler et al., 2015. J Pediatr Hematol Oncol;37(8):e481-5.    | MF (SP+PG)    | M | 13 | N     | N    | N    | N    | N    | AH   |
| 2015 | Karim et al., 2015. Am J Orthop (Belle Mead NJ);44(11):E473-7. | UF (PG)       | M | 27 | N     | Y    | Y    | N    | N    | AH   |
| 2015 | Duraisamy et al., 2015. J Clin Diagn Res;9(11):ZD25-7.         | UF (CR)       | F | 29 | N     | N    | N    | N    | N    | n.a. |
| 2015 | El-Kouba et al., 2015. Rev Bras Ortop;45(6):618-22.            | UF (UL)       | M | 12 | N     | N    | Y    | N    | N    | AH   |
| 2015 | Kim et al., 2015. J Oral Maxillofac Surg;73(12):2352-60.       | MG (SP+CR)    | M | 12 | CT    | Y    | Y    | N    | Y    | DIED |
| 2016 | Yamagishi et al., 2016. J Pediatr Orthop B;25(1):48-53.        | UF (LL)       | M | 10 | N     | N    | N    | N    | N    | AH   |
| 2016 | Demir et al., 2016. Spine J;16(1):e19-21.                      | UF (SP)       | M | 25 | MM    | n.a. | n.a. | n.a. | n.a. | n.a. |
| 2016 | Ellati et al., 2016. Eur Rev Med Pharmacol Sci;20(3):426-32.   | UF (UL)       | M | 18 | N     | Y    | Y    | N    | N    | AH   |
| 2016 | Ganal-Antonio et al., 2016. Spine J;16(2):e67-75.              | MF (SP+UL)    | F | 14 | SCY   | N    | Y    | N    | N    | DIED |
| 2016 | Davalos et al., 2016. Radiol                                   | MF (UL+LL)    | F | 9  | CT+MM | n.a. | n.a. | n.a. | n.a. | n.a. |

|      |                                                                    |               |   |    |       |   |   |   |   |      |
|------|--------------------------------------------------------------------|---------------|---|----|-------|---|---|---|---|------|
|      | Case Rep;10(2):1110.                                               |               |   |    |       |   |   |   |   |      |
| 2016 | Liu et al., 2016. Clin Rheumatol;35(3):813-23.                     | MF (SP+RI)    | F | 32 | PCE   | N | N | N | N | AWD  |
| 2016 | Liu et al., 2016. Clin Rheumatol;35(3):813-23.                     | MF (LL+RI+UL) | M | 15 | CT+SK | N | N | N | N | n.a. |
| 2016 | Liu et al., 2016. Clin Rheumatol;35(3):813-23.                     | UF (UL)       | F | 12 | N     | N | Y | N | N | n.a. |
| 2016 | Liu et al., 2016. Clin Rheumatol;35(3):813-23.                     | UF(PG)        | F | 29 | N     | Y | Y | N | N | AH   |
| 2016 | Liu et al., 2016. Clin Rheumatol;35(3):813-23.                     | MF (CR+PG+LL) | F | 14 | N     | N | Y | N | N | AH   |
| 2016 | Liu et al., 2016. Clin Rheumatol;35(3):813-23.                     | MF (CR+PG+LL) | F | 21 | N     | N | Y | N | N | AH   |
| 2016 | Liu et al., 2016. Clin Rheumatol;35(3):813-23.                     | UF (RI)       | M | 32 | CT    | N | N | N | N | AWD  |
| 2016 | Liu et al., 2016. Clin Rheumatol;35(3):813-23.                     | MF (SP+LL+UL) | F | 22 | CT    | N | Y | N | N | AWD  |
| 2016 | Liu et al., 2016. Clin Rheumatol;35(3):813-23.                     | MF (CR+PG+SP) | F | 40 | N     | Y | Y | N | N | AWD  |
| 2016 | Liu et al., 2016. Clin Rheumatol;35(3):813-23.                     | UF (UL)       | F | 37 | N     | N | Y | N | N | AH   |
| 2016 | Liu et al., 2016. Clin Rheumatol;35(3):813-23.                     | UF (LL)       | M | 3  | N     | N | Y | N | N | AH   |
| 2016 | Liu et al., 2016. Clin Rheumatol;35(3):813-23.                     | UF (RI)       | M | 23 | CT    | Y | Y | N | N | AH   |
| 2016 | Tolis et al., 2016. J Musculoskelet Neuronal Interact;16(1):79-82. | UF (PG)       | F | 22 | N     | Y | Y | N | N | AWD  |
| 2016 | Cramer et al., 2016. J Pediatr Hematol Oncol;38(3):e129-32.        | UF (RI)       | M | 18 | CT    | N | Y | Y | Y | AH   |
| 2016 | Patel et al., 2016. Case Rep Neurol;8(1):66-71.                    | MF (CR+SP)    | M | 8  | CRH   | N | N | N | N | AH   |
| 2016 | Nozawa et al., 2016. Pediatr Blood Cancer;63(5):931-4.             | UF(CR)        | M | 3  | CSFL  | N | N | Y | Y | AH   |

|      |                                                                       |            |   |    |       |      |      |      |      |      |
|------|-----------------------------------------------------------------------|------------|---|----|-------|------|------|------|------|------|
| 2016 | Ludwig et al., 2016. Lymphology;49(2):73-84.                          | MF(RI+UL)  | F | 3  | CT+PE | N    | Y    | Y    | Y    | DIED |
| 2016 | Schell et al., 2016. Spine J;16(7):e467-72.                           | MF(SP)     | F | 31 | N     | N    | N    | N    | N    | AH   |
| 2016 | Zakhary et al., 2016. Br J Oral Maxillofac Surg;54(7):845-6.          | UF (CR)    | F | 54 | N     | N    | N    | N    | N    | AH   |
| 2016 | Gataa et al., 2016. J Oral Maxillofac Surg;74(9):1774-82.             | UF (CR)    | F | 15 | N     | N    | N    | N    | N    | AH   |
| 2016 | Hellyer et al., 2016. AJP Rep.;6(4):e355-e358                         | UF (UL)    | F | 20 | CT    | N    | Y    | N    | N    | n.a. |
| 2016 | Amirjamshidi et al., 2016. Br J Neurosurg. 30(6):687-688.             | UF (CR)    | M | 62 | N     | N    | Y    | N    | Y    | AH   |
| 2016 | García et al; 2016 Colomb Med (Cali). 2016 Dec 30;47(4):213-216.      | UF (RI)    | F | 43 | CT    | N    | N    | Y    | N    | AH   |
| 2017 | Renacci et al., 2017. Clin Imaging;41:83-85.                          | UF (LL)    | M | 30 | N     | Y    | Y    | N    | N    | AH   |
| 2017 | Bocchialini et al.,2017. Int J Surg Case Rep; 34:110-114.             | MF (LL+CR) | F | 14 | N     | n.a. | n.a. | n.a. | n.a. | n.a. |
| 2017 | Mohapatra et al., 2017 J Clin Pediatr Dent; 41(6):472-477             | UF (CR)    | F | 7  | N     | Y    | N    | N    | N    | AH   |
| 2017 | Franco-Barrera et al., 2017. Clin Rev Allergy Immunol; 52(1):125-132. | UF (CR)    | F | 8  | N     | N    | N    | N    | N    | AWD  |
| 2017 | Naqvi et al., 2017. J Surg Case Rep;2017(2):rjx025.                   | UF (CR)    | M | 38 | N     | n.a. | n.a. | n.a. | n.a. | n.a. |
| 2017 | Tateda et al., 2017. Tohoku J Exp Med;241(4):249-254.                 | UF(SP)     | M | 15 | CT    | Y    | N    | N    | Y    | AH   |
| 2017 | Suh et al., 2017. J Vasc Interv Radiol;28(5):702-703                  | UF (RI)    | / | 13 | CT    | N    | N    | Y    | N    | AH   |
| 2017 | Gbaguidi et al., 2017. Neurochirurgie;63(2):103-106.                  | UF (SP)    | M | 33 | CT    | N    | N    | N    | N    | DIED |
| 2017 | Brance et al., 2017. Clin Cases Miner Bone Metab;14(2):250-253.       | MF(UL)     | F | 56 | N     | N    | Y    | N    | N    | AWD  |



|      |                                                                 |               |   |    |          |      |      |      |      |      |
|------|-----------------------------------------------------------------|---------------|---|----|----------|------|------|------|------|------|
| 2017 | Brance et al., 2017. Clin Cases Miner Bone Metab;14(2):250-253. | UF (UL)       | M | 70 | N        | N    | Y    | N    | N    | AH   |
| 2017 | Zhao et al., 2017. Rheumatology (Oxford);56(8):1311.            | UF (CR)       | F | 40 | N        | Y    | Y    | N    | Y    | AH   |
| 2017 | Nagashima et al., 2017. Neurol Neurochir Pol;51(5):427-431.     | UF (CR)       | F | 25 | CSFL     | N    | N    | N    | N    | AH   |
| 2017 | Ballas et al., 2017. Joint Bone Spine; 84(5):625.               | UF (PG)       | F | 46 | N        | n.a. | n.a. | n.a. | n.a. | n.a. |
| 2017 | Park et al., 2017. Clin Nucl Med;42(10):779-781.                | UF (CR)       | M | 13 | N        | N    | Y    | N    | N    | AWD  |
| 2017 | Liu et al., 2017. Medicine (Baltimore);96(42):e8184.            | UF(CR)        | F | 29 | N        | N    | N    | N    | N    | AWD  |
| 2017 | Bargagliet al.,2017. AJP Rep;7(4):e226-e229.                    | MF (SP+PG+RI) | F | 32 | CT       | N    | N    | N    | N    | AH   |
| 2017 | Páez Codeso et al., 2017. Arch Bronconeumol;53(11):640.         | UF (UL)       | / | 14 | CT       | N    | Y    | N    | Y    | AH   |
| 2017 | Klein et al., 2017. J Pediatr; 191:277-277.e1.                  | UF (UL)       | F | 8  | N        | N    | Y    | N    | N    | AWD  |
| 2018 | Stroh et al.,2018. J Neuroophthalmol;38(1):70-74.               | UF (CR)       | F | 66 | N        | N    | Y    | N    | N    | n.a. |
| 2018 | Mulvihill et al., 2018. J Laryngol Otol;132(3):279-281.         | UF(CR)        | M | 51 | N        | N    | N    | N    | N    | AH   |
| 2018 | Stevens et al.,2018. BMJ Case Rep;2018:bcr2017224061.           | UF (UL)       | F | 44 | N        | n.a. | n.a. | n.a. | n.a. | n.a. |
| 2018 | Tasis et al., 2018. Case Rep Pulmonol;2018:2406496.             | MF (SP)       | F | 24 | MCL+CSFL | N    | N    | N    | N    | AH   |
| 2018 | Soh et al.,2018. Oral Radiol;34(2):179-184.                     | UF (CR)       | M | 14 | N        | N    | N    | N    | Y    | n.a. |
| 2018 | Cho SJ et al.,2018. Acute Crit Care;33(2):105-109.              | MF (UL+LL+RI) | F | 14 | CT       | N    | N    | N    | Y    | AH   |
| 2018 | Mao et al., 2018. Rheumatology (Oxford);57(6):1122-1124.        | MF (UL+RI+CR) | M | 42 | SK       | N    | Y    | N    | N    | AWD  |

|      |                                                              |            |   |    |         |      |      |      |      |      |
|------|--------------------------------------------------------------|------------|---|----|---------|------|------|------|------|------|
| 2018 | Reipschläger et al., 2018. JAAD Case Rep;4(5):458-461.       | UF (UL)    | M | 0  | SK      | N    | N    | N    | N    | AH   |
| 2018 | Liu et al., 2018. Medicine (Baltimore);97(29):e11555.        | MF (SP+RI) | M | 31 | CT      | N    | Y    | N    | Y    | AH   |
| 2018 | Mo et al., 2018. JBJS Case Connect;8(3):e70.                 | MF (SP+RI) | M | 14 | N       | N    | Y    | Y    | N    | AH   |
| 2018 | Liu et al., 2018. Chin Med J (Engl);131(13):1628-1629.       | UF(LL)     | F | 27 | CT+PE   | N    | Y    | N    | Y    | AH   |
| 2018 | Galiay et al.,2018. J Craniomaxillofac Surg;46(8):1179-1184. | MF (CR+UL) | M | 1  | ME      | N    | Y    | N    | N    | AH   |
| 2018 | Galiay et al.,2018. J Craniomaxillofac Surg;46(8):1179-1184. | UF (CR)    | M | 3  | ME      | N    | Y    | N    | Y    | AH   |
| 2018 | Galiay et al.,2018. J Craniomaxillofac Surg;46(8):1179-1184. | MF (UL+CR) | F | 0  | ME      | N    | Y    | N    | Y    | AH   |
| 2018 | Galiay et al.,2018. J Craniomaxillofac Surg;46(8):1179-1184. | MF (SP+CR) | M | 4  | N       | N    | N    | N    | N    | AWD  |
| 2018 | Li et al., 2018. Orthop Surg;10(3):276-280.                  | MF (UL+RI) | M | 26 | CT      | Y    | Y    | N    | N    | AH   |
| 2018 | Metaxa et al., 2018. Br J Hosp Med (Lond);79(8):473.         | UF (UL)    | M | 41 | VT      | n.a. | n.a. | n.a. | n.a. | n.a. |
| 2018 | Suranigi et al., 2018 . BMJ Case Rep;2018:bcr2018226768      | MF (UL+SP) | F | 37 | N       | N    | N    | N    | N    | AWD  |
| 2018 | Maillet et al., 2018. Eur Spine J;27(9):2285-2290.           | UF (SP)    | F | 30 | CT      | N    | Y    | N    | N    | AH   |
| 2018 | Peragallo et al., 2018. J Neuroophthalmol;38(3):419-421.     | MF(CR)     | F | 14 | ME+CSFL | N    | Y    | N    | N    | AWD  |
| 2018 | Ganau et al., 2018. Hell J Nucl Med;21(3):198-201.           | UF (CR)    | F | 46 | N       | N    | Y    | N    | N    | AH   |
| 2018 | Kotaru et al., 2018. J Bronchology Interv                    | UF (UL+RI) | F | 36 | CT      | n.a. | n.a. | n.a. | n.a. | AH   |

|      |                                                                                |                  |   |    |        |      |      |      |      |      |
|------|--------------------------------------------------------------------------------|------------------|---|----|--------|------|------|------|------|------|
|      | Pulmonol;25(4):340-342.                                                        |                  |   |    |        |      |      |      |      |      |
| 2018 | Yoshimoto et al., 2018. J Neurosurg Pediatr;22(5):508-512.                     | UF(LL)           | F | 2  | CSFL   | N    | N    | Y    | Y    | AWD  |
| 2018 | Jaccard et al., 2018. Surg Neurol Int;9:223.                                   | MF (SP+RI)       | F | 23 | N      | N    | N    | N    | N    | AWD  |
| 2018 | Liu et al., 2018. QJM;111(12):911-912.                                         | MF (UL+SP+RI)    | F | 29 | CT     | N    | Y    | N    | Y    | AH   |
| 2018 | Wang et al., 2018. J Pediatr;203:456.                                          | UF(UL)           | F | 3  | CT     | n.a. | n.a. | n.a. | n.a. | n.a. |
| 2018 | Illeez et al., 2018. Orthopade;47(12):1032-1035. English.                      | UF (LL)          | F | 55 | N      | N    | Y    | N    | N    | AH   |
| 2019 | Ramaroli et al., 2019. Horm Res Paediatr;91(6):406-410.                        | MF (UL+RI+SP+LL) | M | 1  | CT+MM  | N    | Y    | N    | Y    | AH   |
| 2019 | Zhang et al., 2019. Oral Surg Oral Med Oral Pathol Oral Radiol;127(2):e71-e76. | UF (CR)          | M | 34 | N      | N    | N    | N    | N    | AH   |
| 2019 | Zhang et al., 2019. Oral Surg Oral Med Oral Pathol Oral Radiol;127(2):e71-e76. | UF (CR)          | M | 16 | N      | N    | N    | N    | N    | AH   |
| 2019 | Cho et al., 2019. Korean J Thorac Cardiovasc Surg;52(1):44-46.                 | MF (UL+RI+SP)    | F | 11 | CT     | N    | N    | Y    | N    | AH   |
| 2019 | Feng et al., 2019. BMC Musculoskelet Disord;20(1):73.                          | UF (UL)          | F | 52 | N      | N    | N    | N    | N    | AH   |
| 2019 | Jiang et al., 2019. Medicine (Baltimore);98(14):e15023.                        | MF (UL+SP+RI+LL) | F | 15 | CT+PCE | N    | Y    | N    | N    | AH   |
| 2019 | Matsumoto et al., 2019. JBJS Case Connect;9(2):e0285.                          | UF (UL)          | M | 47 | N      | N    | Y    | N    | N    | AWD  |
| 2019 | Matsumoto et al., 2019. JBJS Case Connect;9(2):e0285.                          | MF (UL)          | F | 72 | N      | N    | N    | N    | N    | AWD  |
| 2019 | Wang et al., 2019. BMC Musculoskelet Disord;20(1):154.                         | MF(SP+RI)        | F | 14 | CT     | N    | Y    | N    | N    | AH   |

|      |                                                                   |               |   |    |        |      |      |      |      |      |
|------|-------------------------------------------------------------------|---------------|---|----|--------|------|------|------|------|------|
| 2019 | Ricci et al., 2019. <i>Pediatr Blood Cancer</i> ;66(5):e27614     | MF (UL+PG+LL) | / | 5  | N      | N    | N    | Y    | N    | AWD  |
| 2019 | Ricci et al., 2019. <i>Pediatr Blood Cancer</i> ;66(5):e27614     | MF (SP+LL+PG) | / | 11 | N      | N    | Y    | Y    | Y    | AWD  |
| 2019 | Ricci et al., 2019. <i>Pediatr Blood Cancer</i> ;66(5):e27614     | UF (PG)       | / | 13 | N      | N    | N    | Y    | Y    | AWD  |
| 2019 | Ricci et al., 2019. <i>Pediatr Blood Cancer</i> ;66(5):e27614     | MF (CR+SP)    | / | 14 | N      | N    | N    | Y    | N    | AWD  |
| 2019 | Ricci et al., 2019. <i>Pediatr Blood Cancer</i> ;66(5):e27614     | MF (RI+SP+UL) | / | 23 | CT+PCE | N    | Y    | Y    | Y    | AWD  |
| 2019 | Ferreiro et al., 2019. <i>Pulmonology</i> ;25(3):195-197.         | MF(SP+PG)     | M | 37 | CT     | N    | N    | Y    | N    | AH   |
| 2019 | Kaissi et al., 2019. <i>Medicines (Basel)</i> ;6(2):54.           | MF (SP+PG)    | M | 7  | N      | n.a. | n.a. | n.a. | n.a. | n.a. |
| 2019 | Kaissi et al., 2019. <i>Medicines (Basel)</i> ;6(2):54.           | UF(SP)        | F | 10 | N      | n.a. | n.a. | n.a. | n.a. | n.a. |
| 2019 | Kaissi et al., 2019. <i>Medicines (Basel)</i> ;6(2):54.           | MF (SP+UL)    | F | 20 | N      | n.a. | n.a. | n.a. | n.a. | n.a. |
| 2019 | Kaissi et al., 2019. <i>Medicines (Basel)</i> ;6(2):54.           | MF (LL+PG+UL) | F | 13 | N      | n.a. | n.a. | n.a. | n.a. | n.a. |
| 2019 | Ali et al., 2019. <i>Cureus</i> ;11(6):e4832.                     | UF (UL)       | F | 18 | N      | N    | N    | N    | N    | n.a. |
| 2019 | Tena-Sanabria et al., 2019. <i>BMC Pediatr</i> ;19(1):206.        | UF (LL)       | M | 7  | N      | N    | N    | N    | N    | AH   |
| 2019 | Tena-Sanabria et al., 2019. <i>BMC Pediatr</i> ;19(1):206.        | UF(SP+CR)     | M | 6  | N      | Y    | N    | N    | N    | DIED |
| 2019 | Nozawa et al., 2019. <i>Intern Med</i> ;58(13):1929-1933.         | UF (CR)       | M | 27 | N      | Y    | Y    | Y    | N    | DIED |
| 2019 | Schneider et al., 2019. <i>Dtsch Arztebl Int</i> ;116(29-30):507. | UF (PG)       | F | 29 | N      | N    | Y    | N    | N    | AH   |
| 2019 | Kim et al., 2019. <i>World Neurosurg</i> ;129:277-281.            | MF (SP+RI)    | M | 22 | CT     | N    | N    | N    | N    | AH   |
| 2019 | Vaishya et al. 2019. <i>J Orthop</i> ;18:177-180.                 | UF (LL)       | F | 68 | N      | N    | N    | N    | N    | AH   |
| 2019 | Koto et al., 2019. <i>Mol Clin</i>                                | MF (SP+RI)    | M | 77 | SCY    | Y    | Y    | N    | N    | DIED |

|      |                                                              |                     |   |    |         |      |      |      |      |      |
|------|--------------------------------------------------------------|---------------------|---|----|---------|------|------|------|------|------|
|      | Oncol;11(6):551-556.                                         |                     |   |    |         |      |      |      |      |      |
| 2019 | Zheng et al., 2019. BMC Musculoskelet Disord;21(1):3.        | UF (LL)             | M | 40 | N       | N    | Y    | N    | N    | AH   |
| 2020 | Zanelli et al., 2020. Int J Surg Pathol;28(1):76-77.         | MF (SP+RI)          | F | 49 | n.a.    | n.a. | n.a. | n.a. | n.a. | n.a. |
| 2020 | Stephens et al., 2020. J Clin Neurosci;72:486-492.           | MF (CR+SP)          | M | 5  | N       | N    | Y    | Y    | N    | AH   |
| 2020 | de Keyser et al., 2020. Front Endocrinol (Lausanne);11:37.   | UF (CR)             | M | 6  | N       | N    | Y    | N    | N    | n.a. |
| 2020 | Jha et al., 2020. BMJ Case Rep;13(2):e230379.                | UF (LL)             | M | 2  | CT+SK   | Y    | N    | N    | N    | n.a. |
| 2020 | Oguz et al., 2020. Indian J Pediatr;87(3):239-240.           | UF (SP)             | F | 8  | PCE     | N    | N    | Y    | N    | AH   |
| 2020 | Schneider et al., 2020. Acta Orthop. 2020 Apr;91(2):209-214. | MF (CR+SP+RI+UL+LL) | M | 5  | CT      | N    | Y    | Y    | N    | AH   |
| 2020 | Schneider et al., 2020. Acta Orthop. 2020 Apr;91(2):209-214. | MF (LL+PG+UL+SP)    | M | 21 | SK      | N    | N    | N    | N    | AWD  |
| 2020 | Schneider et al., 2020. Acta Orthop. 2020 Apr;91(2):209-214. | MF (SP+LL+UL)       | M | 13 | CT+CSFL | N    | Y    | Y    | N    | AH   |
| 2020 | Schneider et al., 2020. Acta Orthop. 2020 Apr;91(2):209-214. | UF (LL)             | F | 11 | N       | N    | Y    | N    | N    | AH   |
| 2020 | Schneider et al., 2020. Acta Orthop. 2020 Apr;91(2):209-214. | UF (UL)             | M | 42 | N       | N    | Y    | N    | N    | AH   |
| 2020 | Schneider et al., 2020. Acta Orthop. 2020 Apr;91(2):209-214. | UF (SP)             | M | 12 | N       | N    | Y    | N    | N    | AH   |
| 2020 | Hosoya et al., 2020. J Otolaryngol Head Neck Surg;49(1):18.  | UF (CR)             | M | 25 | CSFL    | N    | N    | N    | N    | AH   |
| 2020 | Chang et al., 2020. Exp Ther                                 | MF (CR+SP)          | M | 22 | CT      | Y    | Y    | N    | N    | AH   |

|      |                                                                         |               |   |    |         |   |   |   |   |      |
|------|-------------------------------------------------------------------------|---------------|---|----|---------|---|---|---|---|------|
|      | Med;19(6):3851-3855.                                                    |               |   |    |         |   |   |   |   |      |
| 2020 | Elera-Fitzcarrald et al.,2020. J Clin Rheumatol;26(5):e135-e136.        | UF (RI)       | M | 39 | CT      | N | Y | N | N | AH   |
| 2020 | Al Baroudi et al., 2020. Am J Respir Crit Care Med;202(3):451-452.      | UF (RI)       | M | 15 | CT      | N | Y | Y | N | AH   |
| 2020 | Liang et al., 2020. BMC Musculoskelet Disord;21(1):577.                 | MF (UL+LL)    | M | 1  | CT      | N | Y | Y | N | AH   |
| 2020 | Jagtap et al., 2020. Oral Radiol;36(4):389-394.                         | MF (RI+CR)    | M | 3  | N       | N | Y | N | Y | AWD  |
| 2020 | Ogawa et al., 2020. J Dermato;47(11):e388-e390.                         | MF(LL+SP)     | F | 9  | CT+SK   | N | N | Y | N | n.a. |
| 2020 | Yokoi et al., 2020. Surg Neurol Int;11:466.                             | UF (SP)       | F | 14 | CT+CSFL | N | Y | Y | N | AWD  |
| 2021 | Esper et al., 2021. Oxf Med Case Reports;2021(1):omaa121.               | MF (PG+LL)    | F | 60 | N       | N | Y | N | N | AH   |
| 2021 | Takaya et al., 2021. Br J Neurosurg;35(1):27-31.                        | UF (CR)       | F | 22 | N       | N | N | N | N | AH   |
| 2021 | Takaya et al., 2021. Br J Neurosurg;35(1):27-31.                        | UF (CR)       | F | 67 | N       | N | N | N | N | AH   |
| 2021 | Kuczarski et al., 2021. J Hand Surg Am;46(2):154.e1-154.e4.             | UF (UL)       | F | 21 | N       | N | N | N | N | AWD  |
| 2021 | Gui et al., 2021. Surg Neurol Int;12:227                                | UF (SP)       | M | 25 | N       | N | N | N | N | AWD  |
| 2021 | Aouad et al., 2021. Childs Nerv Syst.                                   | UF (CR)       | F | 3  | CSFL    | N | N | N | N | AH   |
| 2021 | Momanu et al., 2021. Medicina (Kaunas);57(7):681.                       | MF (UL+RI+LL) | F | 18 | CT      | N | N | N | N | DIED |
| 2021 | Forero Saldarriaga et al., 2021. Eur J Case Rep Intern Med;8(8):002740. | UF (CR)       | M | 33 | N       | N | Y | Y | N | AH   |
| 2021 | Grönroos et al., 2021. J Med                                            | MF (SP+RI)    | M | 23 | CT      | Y | Y | N | Y | AH   |

|      |                                                       |         |   |    |         |   |   |   |   |    |
|------|-------------------------------------------------------|---------|---|----|---------|---|---|---|---|----|
|      | Case Rep;15(1):427.                                   |         |   |    |         |   |   |   |   |    |
| 2021 | Watanabe et al., 2021. Yonago Acta Med;64(3):318-323. | UF (CR) | M | 16 | ME+CSFL | N | N | N | N | AH |

n.a.: not available; Rxt: radiotherapy; UF/MF: Uni/Multifocal; CT: chylothorax; SK: skin; CSFL: cerebral spinal fluid leakage;

AAA: Abdominal Aorta Aneurysm; PE: Peritoneal Effusion; HE: Hepistaxis; MM: Mediastinal Mass; GS: Gynecological Symptoms; SCY: Subaracnoid Cyst; PCE: Pericardial Effusion; CRH; Intracranial Hypertension; MCL: Multiple Cystic Lesions; ME: Meningitis; PNC: Pneumocephalus; VT: Ventricular Tachycardia;

UL: Upper Limb; LL: Lower Limb; SP: Spinal; PG: Pelvic Girdle; CR: Cranial; RI: Ribs;

AWD: Alive with disease/disability; AH: Alive Healty; DE:
